# Supplementary material for: Epithelial to Mesenchymal Transition Regulates Surface PD-L1 via CMTM6 and CMTM7 Induction in Breast Cancer
Source: PubMed Central journal article supplement (PMC7963182; doi:10.3390/cancers13051165), 2021-03-09
Supplement: cancers-13-01165-s001.pdf [file cancers-13-01165-s001.pdf]

**Supplementary Materials:** The following are available online at <https://www.mdpi.com/2072-6694/13/5/1165/s1>.

**Table S1.** List of primers used.

| Primer Name | Primer Sequence         |
|-------------|-------------------------|
| CMTM1-F     | GGCCATGCAAGAAAAGAAAA    |
| CMTM1-R     | CGATGCAACACACGATTACC    |
| CMTM2-F     | CGGCTGGAGTTTTTGCTTT     |
| CMTM2-R     | CTGGGGTCCTTTTTCCTTTC    |
| CMTM3-F     | GGCTTTCCTCTGCTCTCTCA    |
| CMTM3-R     | GAGGACGCCACATAGCAGAT    |
| CMTM5-F     | TGTTTCTCTTGCTGGGCTTT    |
| CMTM5-R     | CCTGGAGCTCTGCAACTACC    |
| CMTM7-F     | TGATCCTCGCCTTTTACCTG    |
| CMTM7-R     | GAGGAGCAGGGTACCGATTA    |
| CMTM8-F     | CCTGAGAGGGACAGTCACAAC   |
| CMTM8-R     | ATTCCAGCGTAGCAGATGG     |
| SNAI1-F     | CGAAAGGCCTTCAACTGCAAA   |
| SNAI1-R     | TGACATCTGAGTGGGTCTGGA   |
| SLUG-F      | CTACAGCGAACTGGACACACA   |
| SLUG-R      | TGGAATGGAGCAGCGGTAGT    |
| ZEB1-F      | CCTCTTCAGGTGCCTCAGGAAAA |
| ZEB1-R      | CCTCTTCAGGTGCCTCAGGAAAA |
| VIMENTIN-F  | CCTTGAACGCAAAGTGAATC    |
| VIMENTIN-R  | GACATGCTGTTCTGAATCTGAG  |
| CDH1-F      | AGTGCCAACTGGACCATTCA    |
| CDH1-R      | TCTTGACCACCGCTTCTCT     |
| CDH2-F      | CTGCGCTGTAAACATCTTCAG   |
| CDH2-R      | CTCCATGTGCCGGATAGC      |
| PDL1-F      | TGCCGACTACAAGCGAATTACTG |
| PDL1-R      | CTGCTTGTCCAGATGACTTCGG  |
| ACTIN-F     | GGTGGCTTTTAGGATGGCAAG   |
| ACTIN-R     | ACTGGAACGGTGAAGGTGACAG  |

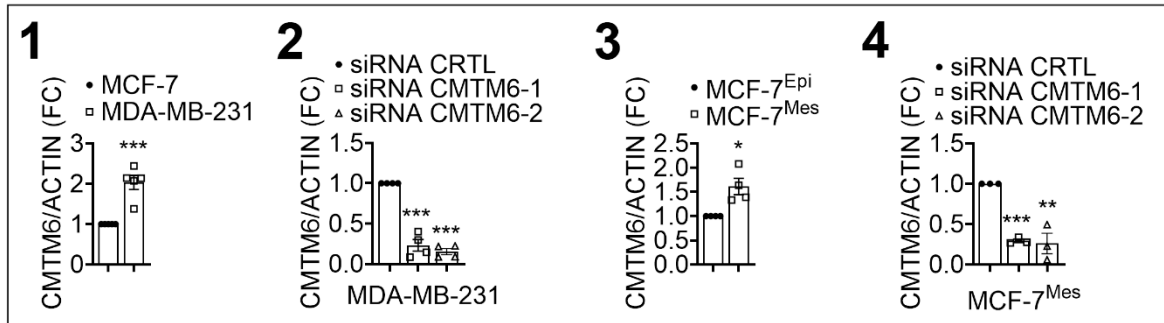

Figure S1-4. Densitometry quantification of Western blot of Figures 1F (1), 1G (2), 2F (3) and 2G (4). The quantification of CMTM6 protein expression was done relative to actin and reported as fold change compared to the control condition (considered as 1). Each dot represents one experiment. Statistically significant differences +/- SEM (indicated by asterisks) are calculated using an unpaired two-tailed Student's t-test (\*  $p < 0.05$ ; \*\*  $p < 0.01$  and \*\*\*  $p < 0.001$ ).
